# Supplementary material for: Anesthetic Propofol Overdose Causes Vascular Hyperpermeability by Reducing Endothelial Glycocalyx and ATP Production
Source: MDPI journal article supplement (doi:10.3390/ijms160612092), 2015-05-27
Supplement: s1 [file s1]

# Supplementary Information

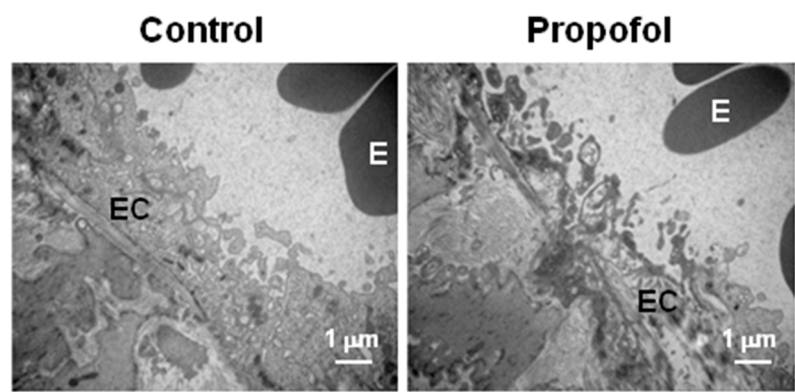

**Figure S1.** Propofol overdose caused vascular endothelial cells to undergo necrotic cell death in ICR mice. Propofol group mice were intraperitoneally injected with 10 mg of PBS-diluted propofol within 5 h; control group mice were injected with PBS only. Loss of plasma membrane integrity and cytoplasm was detected using transmission electron microscopic images of the peritoneal vascular endothelium. EC, endothelial cell; E, erythrocyte.

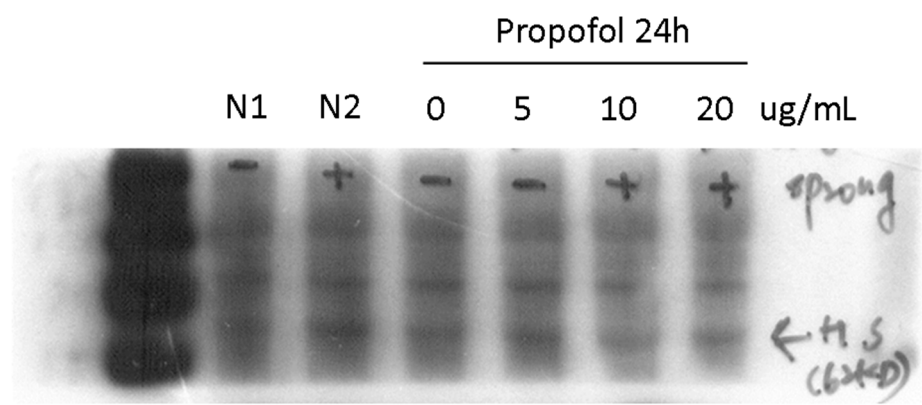

**Figure S2.** HMEC-1 cells treated with or without propofol for 24 h. Endothelial HS expression was detected using Western blotting, as described in the Experimental Section. N1 and N2: negative controls.
